# Supplementary material for: SARS-CoV-2 viremia is associated with distinct proteomic pathways and predicts COVID-19 outcomes
Source: JCI journal article supplement (doi:10.1172/jci148635), 2021-06-30
Supplement: sd1 [file 1]

# Supplementary Materials

|                                                                                                                                                                                                                 |    |
|-----------------------------------------------------------------------------------------------------------------------------------------------------------------------------------------------------------------|----|
| <b>Supplementary Methods</b> .....                                                                                                                                                                              | 2  |
| <b>Supplementary Tables</b> .....                                                                                                                                                                               | 3  |
| Supplementary Table S1. Association of SARS-CoV-2 viral load and clinical outcomes, detailed table including other clinical and laboratory variables. ....                                                      | 3  |
| Supplementary Table S2. Association of SARS-CoV-2 viral load and clinical outcomes, sensitivity analyses. ....                                                                                                  | 5  |
| Supplementary Table S3. Clinical factors associated with viremia.....                                                                                                                                           | 6  |
| Supplementary Table S4. Differentially expressed proteins related to peripheral blood cells. ....                                                                                                               | 7  |
| <b>Supplementary Figures</b> .....                                                                                                                                                                              | 9  |
| Supplementary Figure S1. Correlation between viral load and duration between symptom onset and ED presentation. ....                                                                                            | 9  |
| Supplementary Figure S2. Snapshots of disease severity at Day 0, 3, 7 and 28.....                                                                                                                               | 10 |
| Supplementary Figure S3. Association of viremia and disease severity stratified by age groups. ....                                                                                                             | 11 |
| Supplementary Figure S4. 28-day mortality among different viremic groups.....                                                                                                                                   | 12 |
| Supplementary Figure S5. Heatmap highlighting differentially expressed proteins between viremic and aviremic participants. ....                                                                                 | 13 |
| Supplementary Figure S6. Correlation between LDH, tissue-enriched protein levels, fibrosis markers, IL6, entry factors and viral load. ....                                                                     | 14 |
| Supplementary Figure S7. Volcano plots showing NPX differences in protein levels between viremic and COVID-19 negative control participants at Day 0. ....                                                      | 15 |
| Supplementary Figure S8. Heatmap of the top 100 differentially expressed proteins between viremic and aviremic participants at Day 0.....                                                                       | 16 |
| Supplementary Figure S9. Correlation between apoptosis-related protein, lung/GI tract related protein, pyroptosis-related protein and IL6. ....                                                                 | 17 |
| Supplementary Figure S10. Receiver operating characteristic (ROC) curve showing predictive performance of an elastic net logistic regression classifier of disease severity and viremia for Olink proteins..... | 18 |
| Supplementary Figure S11. Temporal trend of differentially expressed protein identified at Day 0. ....                                                                                                          | 19 |
| Supplementary Figure S12. Mean Z scores of interferon-stimulated genes (ISGs) based on SomaScan results. ....                                                                                                   | 20 |
| Supplementary Figure S13. Neutralization level at Day 3 and Day 7.....                                                                                                                                          | 21 |
| Supplementary Figure S14. Correlation of IL6, CXCL8/IL8, and TNF levels from four different Olink panels.....                                                                                                   | 22 |
| <b>References</b> .....                                                                                                                                                                                         | 23 |

## Supplementary Methods

### Control group

We included 50 participants with respiratory symptoms and an elevated C-reactive protein (CRP >10 mg/dl), who presented to ED during similar period of time with negative SARS-CoV-2 test as control. Demographic information was reported in our prior study <sup>1</sup>.

### Unsupervised clustering

Principal components analysis (PCA) was performed using all proteins and all samples using the `prcomp()` function in R. Unsupervised clustering by UMAP was performed using all proteins, and either all samples or just Day 0 samples, using the `umap()` function in R. UMAP coordinates were plotted using the `ggplot2` package.

### SomaScan plasma proteomic profiling

The SomaScan Platform was reported in our previous study. Briefly, 4979 SOMAmer reagents, single-stranded DNA aptamers were used to detect 4776 unique human protein targets with standard controls <sup>1</sup>.

## Supplementary Tables

Supplementary Table S1. Association of SARS-CoV-2 viral load and clinical outcomes, detailed table including other clinical and laboratory variables.

|                                                   | Univariate OR (95% CI) | P      | Multivariate OR (95% CI) | P                |
|---------------------------------------------------|------------------------|--------|--------------------------|------------------|
| <b>Severe disease</b>                             |                        |        |                          |                  |
| SARS-CoV-2 viremia                                |                        |        |                          |                  |
| Aviremic or below quantification range            | Reference              |        | Reference                |                  |
| Viremic $\geq 2$ log copies/ml                    | 12.56 (5.96, 26.46)    | <0.001 | 10.59 (4.40, 25.51)      | <b>&lt;0.001</b> |
| Age                                               |                        |        |                          |                  |
| <50 years                                         | Reference              |        | Reference                |                  |
| 50-64 years                                       | 2.01 (1.00, 4.04)      | 0.049  | 1.06 (0.43, 2.59)        | 0.91             |
| $\geq 65$ years                                   | 5.32 (2.82, 10.06)     | <0.001 | 2.58 (1.02, 6.52)        | 0.045            |
| Female (male as reference)                        | 0.71 (0.44, 1.14)      | 0.16   |                          |                  |
| Non-Caucasian (Caucasian as reference)            | 1.42 (0.88, 2.29)      | 0.15   |                          |                  |
| Morbid obesity (BMI $\geq 40$ kg/m <sup>2</sup> ) |                        |        |                          |                  |
| No                                                | Reference              |        |                          |                  |
| Yes                                               | 0.86 (0.40, 1.85)      | 0.69   |                          |                  |
| Unknown                                           | 0.43 (0.14, 1.32)      | 0.14   |                          |                  |
| Heart diseases                                    | 1.86 (0.98, 3.50)      | 0.06   | 2.05 (0.79, 5.29)        | 0.14             |
| Lung diseases                                     | 0.49 (0.26, 0.92)      | 0.03   | 0.32 (0.13, 0.80)        | <b>0.02</b>      |
| Hypertension                                      | 2.09 (1.29, 3.38)      | 0.003  | 0.87 (0.41, 1.82)        | 0.70             |
| Diabetes                                          | 1.97 (1.21, 3.21)      | 0.007  | 1.58 (0.80, 3.11)        | 0.19             |
| Immunocompromised conditions                      | 2.53 (1.11, 5.80)      | 0.03   | 1.93 (0.69, 5.41)        | 0.21             |
| Lymphopenia <1000 cells/mm <sup>3</sup>           | 2.83 (1.73, 4.64)      | <0.001 | 2.00 (1.04, 3.84)        | <b>0.03</b>      |
| Creatinine elevation >1.20 mg/dl                  | 3.93 (2.21, 7.00)      | <0.001 | 2.12 (0.92, 4.90)        | 0.08             |
| CRP>100 mg/dl                                     |                        |        |                          |                  |
| No                                                | Reference              |        | Reference                |                  |
| Yes                                               | 4.75 (2.80, 8.08)      | <0.001 | 3.15 (1.60, 6.19)        | <b>0.001</b>     |
| Unknown                                           | 0.85 (0.18, 4.11)      | 0.84   | 1.72 (0.06, 46.51)       | 0.75             |
| D-dimer>1000 ng/ml                                |                        |        |                          |                  |
| No                                                | Reference              |        | Reference                |                  |
| Yes                                               | 3.21 (1.92, 5.39)      | <0.001 | 1.40 (0.71, 2.76)        | 0.34             |
| Unknown                                           | 0.79 (0.21, 2.96)      | 0.73   | 0.63 (0.03, 12.03)       | 0.76             |
| Troponin elevation within 72 hours                | 6.41 (2.46, 16.70)     | <0.001 | 3.74 (1.01, 13.83)       | <b>0.048</b>     |
| <b>Death within Day 28</b>                        |                        |        |                          |                  |
| SARS-CoV-2 viremia                                |                        |        |                          |                  |
| Aviremic or below quantification range            | Reference              |        | Reference                |                  |
| Viremic $\geq 2$ log copies/ml                    | 4.39 (2.15, 8.96)      | <0.001 | 3.86 (1.47, 10.14)       | <b>0.006</b>     |
| Age                                               |                        |        |                          |                  |
| <50 years                                         | Reference              |        | Reference                |                  |
| 50-64 years                                       | 3.43 (0.35, 33.65)     | 0.29   | 1.98 (0.16, 25.25)       | 0.60             |
| $\geq 65$ years                                   | 43.39 (5.82, 323.31)   | <0.001 | 22.61 (2.07, 246.40)     | <b>0.01</b>      |
| Female (male as reference)                        | 0.83 (0.43, 1.60)      | 0.57   |                          |                  |
| Non-Caucasian (Caucasian as reference)            | 0.47 (0.24, 0.93)      | 0.03   | 0.73 (0.29, 1.84)        | 0.50             |
| Morbid obesity (BMI $\geq 40$ kg/m <sup>2</sup> ) |                        |        |                          |                  |
| No                                                | Reference              |        |                          |                  |
| Yes                                               | 0.86 (0.29, 2.61)      | 0.80   |                          |                  |
| Unknown                                           | 1.11 (0.31, 3.97)      | 0.88   |                          |                  |
| Heart diseases                                    | 4.24 (2.03, 8.88)      | <0.001 | 2.97 (1.01, 8.70)        | <b>0.048</b>     |
| Lung diseases                                     | 1.04 (0.47, 2.32)      | 0.92   |                          |                  |
| Hypertension                                      | 3.52 (1.69, 7.34)      | 0.001  | 0.77 (0.28, 2.09)        | 0.61             |
| Diabetes                                          | 1.16 (0.59, 2.29)      | 0.66   |                          |                  |
| Immunocompromised conditions                      | 1.66 (0.59, 4.70)      | 0.34   |                          |                  |
| Lymphopenia <1000 cells/mm <sup>3</sup>           | 7.42 (3.02, 18.25)     | <0.001 | 6.62 (2.19, 20.00)       | <b>0.001</b>     |
| Creatinine elevation >1.20 mg/dl                  | 5.98 (2.99, 12.01)     | <0.001 | 2.36 (0.91, 6.08)        | 0.08             |

|                                    |                    |       |                       |             |
|------------------------------------|--------------------|-------|-----------------------|-------------|
| CRP>100 mg/dl                      |                    |       |                       |             |
| No                                 | Reference          |       | Reference             |             |
| Yes                                | 2.83 (1.35, 5.93)  | 0.006 | 1.78 (0.67, 4.68)     | 0.25        |
| Unknown                            | 2.38 (0.46, 12.26) | 0.30  | 87.47 (1.52, 5038.05) | <b>0.03</b> |
| D-dimer>1000 ng/ml                 |                    |       |                       |             |
| No                                 | Reference          |       | Reference             |             |
| Yes                                | 3.42 (1.56, 7.50)  | 0.002 | 1.40 (0.49, 3.99)     | 0.53        |
| Unknown                            | 1.97 (0.39, 10.03) | 0.42  | 0.15 (0.004, 6.51)    | 0.33        |
| Troponin elevation within 72 hours | 3.68 (1.46, 9.27)  | 0.006 | 0.91 (0.26, 3.23)     | 0.89        |

Supplementary Table S2. Association of SARS-CoV-2 viral load and clinical outcomes, sensitivity analyses.

|                                                                                     | Univariate OR (95% CI) | P      | Multivariate OR (95% CI) | P      |
|-------------------------------------------------------------------------------------|------------------------|--------|--------------------------|--------|
| <b>Severe diseases<sup>a</sup></b>                                                  |                        |        |                          |        |
| <b>SARS-CoV-2 viral load accounting for detectable but non-quantifiable viremia</b> |                        |        |                          |        |
| Aviremic                                                                            | Reference              |        | Reference                |        |
| Viremic but below quantification range                                              | 1.91 (0.99, 3.66)      | 0.054  | 2.01 (0.91, 4.42)        | 0.08   |
| Viremic $\geq$ 2 log copies/ml                                                      | 14.66 (6.82, 31.53)    | <0.001 | 11.73 (4.79, 28.74)      | <0.001 |
| <b>SARS-CoV-2 viral load as continuous variable</b>                                 |                        |        |                          |        |
| Viral load (per 1 log copy/ml increase)                                             | 2.57 (1.93, 3.43)      | <0.001 | 2.49 (1.75, 3.54)        | <0.001 |
| <b>Death at day 28<sup>b</sup></b>                                                  |                        |        |                          |        |
| <b>SARS-CoV-2 viral load accounting for detectable but non-quantifiable viremia</b> |                        |        |                          |        |
| Aviremic                                                                            | Reference              |        | Reference                |        |
| Viremic but below quantification range                                              | 1.58 (0.62, 4.05)      | 0.34   | 1.17 (0.36, 3.83)        | 0.79   |
| Viremic $\geq$ 2 log copies/ml                                                      | 4.92 (2.30, 10.53)     | <0.001 | 4.01 (1.46, 11.06)       | 0.007  |
| <b>SARS-CoV-2 viral load as continuous variable</b>                                 |                        |        |                          |        |
| Viral load (per 1 log copy/ml increase)                                             | 1.67 (1.33, 2.10)      | <0.001 | 1.46 (1.08, 1.97)        | 0.01   |

a, multivariate models were adjusted for age groups, heart diseases, lung diseases, hypertension, diabetes, immunocompromised conditions, lymphopenia, creatinine elevation, C reactive protein elevation, D-dimer elevation and troponin elevation. Seen in Table 2.

b, multivariate models were adjusted for age groups, race, heart diseases, hypertension, lymphopenia, creatinine elevation, C reactive protein elevation, D dimer elevation, troponin elevation. Seen in Table 2.

Supplementary Table S3. Clinical factors associated with viremia.

|                                            | Univariate OR (95% CI) | P     | Multivariate OR (95% CI) | P           |
|--------------------------------------------|------------------------|-------|--------------------------|-------------|
| Age                                        |                        |       |                          |             |
| <50 years                                  | Reference              |       | Reference                |             |
| 50-64 years                                | 1.82 (0.77, 4.29)      | 0.17  | 1.33 (0.53, 3.34)        | 0.54        |
| ≥65 years                                  | 2.68 (1.23, 5.84)      | 0.01  | 1.75 (0.69, 4.44)        | 0.24        |
| Female (male as reference)                 | 0.60 (0.33, 1.11)      | 0.10  |                          |             |
| Non-Caucasian (Caucasian as reference)     | 1.52 (0.83, 2.76)      | 0.18  |                          |             |
| Morbid obesity (BMI≥40 kg/m <sup>2</sup> ) |                        |       |                          |             |
| No                                         | Reference              |       |                          |             |
| Yes                                        | 1.24 (0.51, 3.04)      | 0.64  |                          |             |
| Unknown                                    | 0.51 (0.11, 2.29)      | 0.38  |                          |             |
| Heart diseases                             | 0.66 (0.26, 1.65)      | 0.37  |                          |             |
| Lung diseases                              | 0.42 (0.17, 1.02)      | 0.06  | 0.40 (0.15, 1.07)        | 0.07        |
| Hypertension                               | 1.29 (0.71, 2.33)      | 0.41  |                          |             |
| Diabetes                                   | 2.34 (1.28, 4.27)      | 0.006 | 2.15 (1.13, 4.10)        | <b>0.02</b> |
| Immunocompromised conditions               | 1.18 (0.42, 3.31)      | 0.75  |                          |             |
| Lymphopenia <1000 cells/mm <sup>3</sup>    | 1.86 (1.01, 3.43)      | 0.045 | 1.38 (0.70, 2.71)        | 0.35        |
| Creatinine elevation >1.20 mg/dl           | 2.01 (1.04, 3.88)      | 0.04  | 1.29 (0.58, 2.87)        | 0.53        |
| CRP>100 mg/dl                              |                        |       |                          |             |
| No                                         | Reference              |       | Reference                |             |
| Yes                                        | 3.22 (1.66, 6.25)      | 0.001 | 2.29 (1.10, 4.75)        | <b>0.03</b> |
| Unknown                                    | 0.83 (0.10, 6.93)      | 0.86  | 0.41 (0.02, 8.45)        | 0.47        |
| D-dimer>1000 ng/ml                         |                        |       |                          |             |
| No                                         | Reference              |       | Reference                |             |
| Yes                                        | 1.98 (1.05, 3.75)      | 0.04  | 1.12 (0.54, 2.32)        | 0.76        |
| Unknown                                    | 0.97 (0.20, 4.67)      | 0.98  | 2.36 (0.24, 23.28)       | 0.46        |
| Troponin elevation within 72 hours         | 2.57 (1.04, 6.36)      | 0.04  | 1.90 (0.64, 5.68)        | 0.25        |

Supplementary Table S4. Differentially expressed proteins related to peripheral blood cells.  
List of protein derived from Monaco et al., Cell Rep 2019 <sup>2</sup>.

| Protein            | NPX difference (Viremic- Aviremic) | Adjusted P value (without severity as covariate) |
|--------------------|------------------------------------|--------------------------------------------------|
| <b>Monocytes</b>   |                                    |                                                  |
| <b>IL6</b>         | 1.71                               | 2.12E-15                                         |
| <b>CCL7</b>        | 1.31                               | 4.00E-14                                         |
| CCL20              | 1.12                               | 1.06E-09                                         |
| <b>CXCL10</b>      | 0.96                               | 1.99E-10                                         |
| <b>VSIG4</b>       | 0.95                               | 1.06E-13                                         |
| <b>CTSL</b>        | 0.65                               | 2.80E-13                                         |
| PTX3               | 0.61                               | 3.61E-09                                         |
| CD300E             | 0.59                               | 4.00E-08                                         |
| <b>CXCL11</b>      | 0.58                               | 3.59E-06                                         |
| PVR                | 0.55                               | 1.81E-10                                         |
| VCAN               | 0.52                               | 2.10E-07                                         |
| CLEC5A             | 0.52                               | 7.25E-09                                         |
| CCL3               | 0.50                               | 4.30E-06                                         |
| CD14               | 0.50                               | 8.22E-07                                         |
| CLEC4D             | 0.50                               | 3.81E-05                                         |
| CCL8               | 0.48                               | 4.89E-05                                         |
| VMO1               | 0.45                               | 9.60E-05                                         |
| SIGLEC10           | 0.44                               | 5.34E-08                                         |
| CXCL16             | 0.43                               | 4.09E-08                                         |
| CES1               | 0.42                               | 1.18E-03                                         |
| HMOX1              | 0.40                               | 2.13E-04                                         |
| <b>LRP1</b>        | 0.40                               | 1.31E-09                                         |
| <b>SIGLEC1</b>     | 0.39                               | 1.00E-07                                         |
| NID1               | 0.39                               | 1.09E-07                                         |
| CLEC1B             | 0.38                               | 1.10E-02                                         |
| TNFRSF8            | 0.37                               | 4.84E-05                                         |
| MSR1               | 0.36                               | 4.37E-06                                         |
| CD300LF            | 0.36                               | 1.41E-02                                         |
| CCL13              | 0.36                               | 4.50E-04                                         |
| TYMP               | 0.35                               | 6.65E-04                                         |
| SPINT1             | 0.31                               | 3.22E-06                                         |
| CST3               | 0.30                               | 2.30E-03                                         |
| CD163              | 0.29                               | 2.50E-05                                         |
| CD93               | 0.28                               | 1.52E-05                                         |
| LILRA5             | 0.27                               | 5.57E-06                                         |
| PLXNB2             | 0.26                               | 1.88E-06                                         |
| <b>OSCAR</b>       | 0.24                               | 1.91E-04                                         |
| CD302              | 0.22                               | 3.73E-02                                         |
| SLAMF8             | 0.21                               | 1.77E-03                                         |
| HBEGF              | 0.21                               | 2.34E-02                                         |
| LILRB2             | 0.20                               | 3.71E-04                                         |
| C1QA               | 0.18                               | 1.37E-02                                         |
| CPVL               | 0.18                               | 3.48E-02                                         |
| <b>Neutrophils</b> |                                    |                                                  |
| <b>CHI3L1</b>      | 1.23                               | 4.82E-14                                         |
| <b>IL1RN</b>       | 0.92                               | 6.62E-11                                         |
| ADM                | 0.73                               | 1.91E-10                                         |
| CD177              | 0.51                               | 1.18E-05                                         |
| <b>TNFSF13B</b>    | 0.50                               | 1.54E-08                                         |
| S100A12            | 0.48                               | 3.66E-09                                         |
| VNN2               | 0.45                               | 1.20E-05                                         |
| SIRPB1             | 0.41                               | 5.11E-06                                         |
| PRTN3              | 0.41                               | 9.02E-07                                         |

|                     |      |          |
|---------------------|------|----------|
| S100P               | 0.37 | 5.76E-04 |
| SIGLEC5             | 0.37 | 1.50E-02 |
| LCN2                | 0.35 | 6.28E-04 |
| MMP9                | 0.28 | 4.88E-03 |
| DEFA1               | 0.24 | 3.28E-02 |
| <b>Plasmablasts</b> |      |          |
| CD138/SDC1          | 0.83 | 4.73E-06 |
| RRM2                | 0.59 | 6.86E-07 |
| MZB1                | 0.46 | 1.09E-04 |
| TXNDC5              | 0.44 | 1.71E-04 |
| <b>CD4+T cells</b>  |      |          |
| TNFRSF4             | 0.26 | 7.89E-03 |
| <b>NK cells</b>     |      |          |
| NCR1                | 0.17 | 2.35E-02 |

Bold font indicates statistical significance after further adjustment for severity. Of note, NPX is already a Log<sub>2</sub> transformed index.



## Supplementary Figures

Supplementary Figure S1. Correlation between viral load and duration between symptom onset and ED presentation.

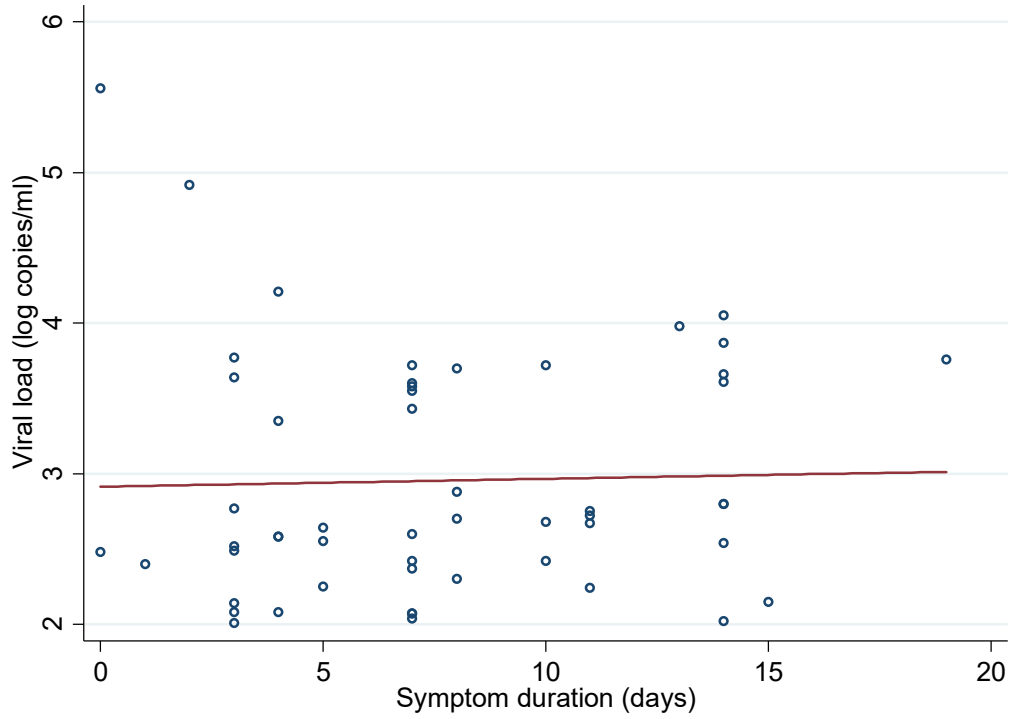

Supplementary Figure S2. Snapshots of disease severity at Day 0, 3, 7 and 28.

The left column was grouped by quantifiable viremia ( $\geq 2$  log copies/ml) and undetectable or unquantifiable viremia ( $< 2$  log copies/ml). The right column was grouped by quantifiable viremia, unquantifiable viremia (detectable but  $< 2$  log copies/ml) and undetectable viremia (aviremic). Chi-squared test or Fisher's exact test was used.

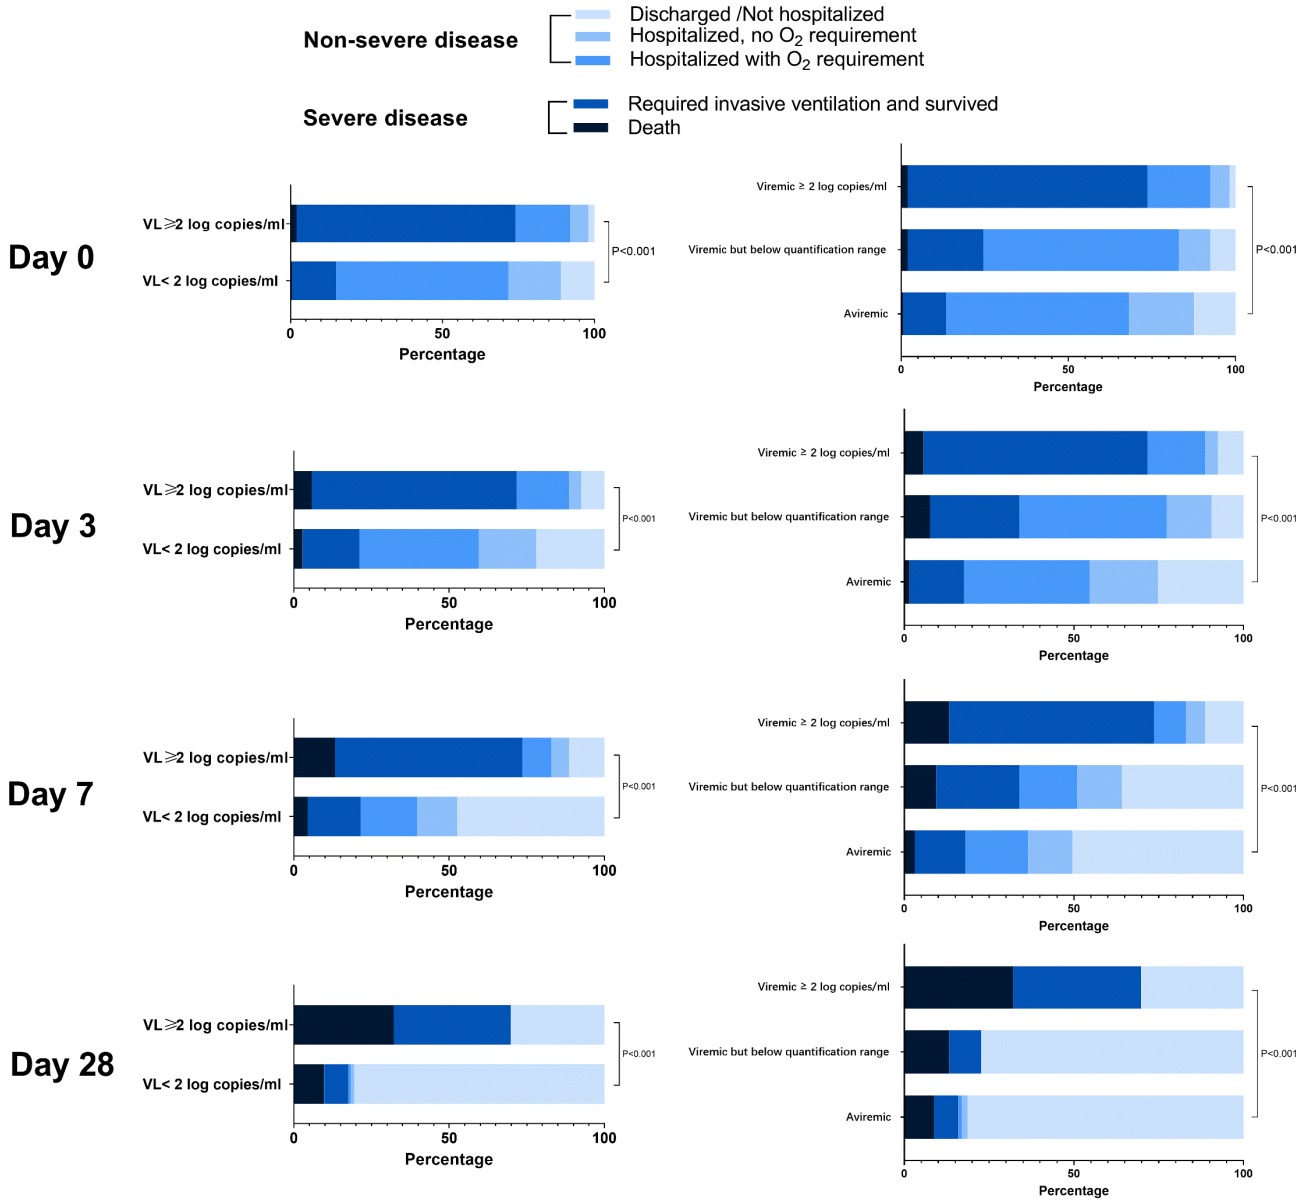

Supplementary Figure S3. Association of viremia and disease severity stratified by age groups. P values were calculated by either chi-squared test or Fisher's exact test.

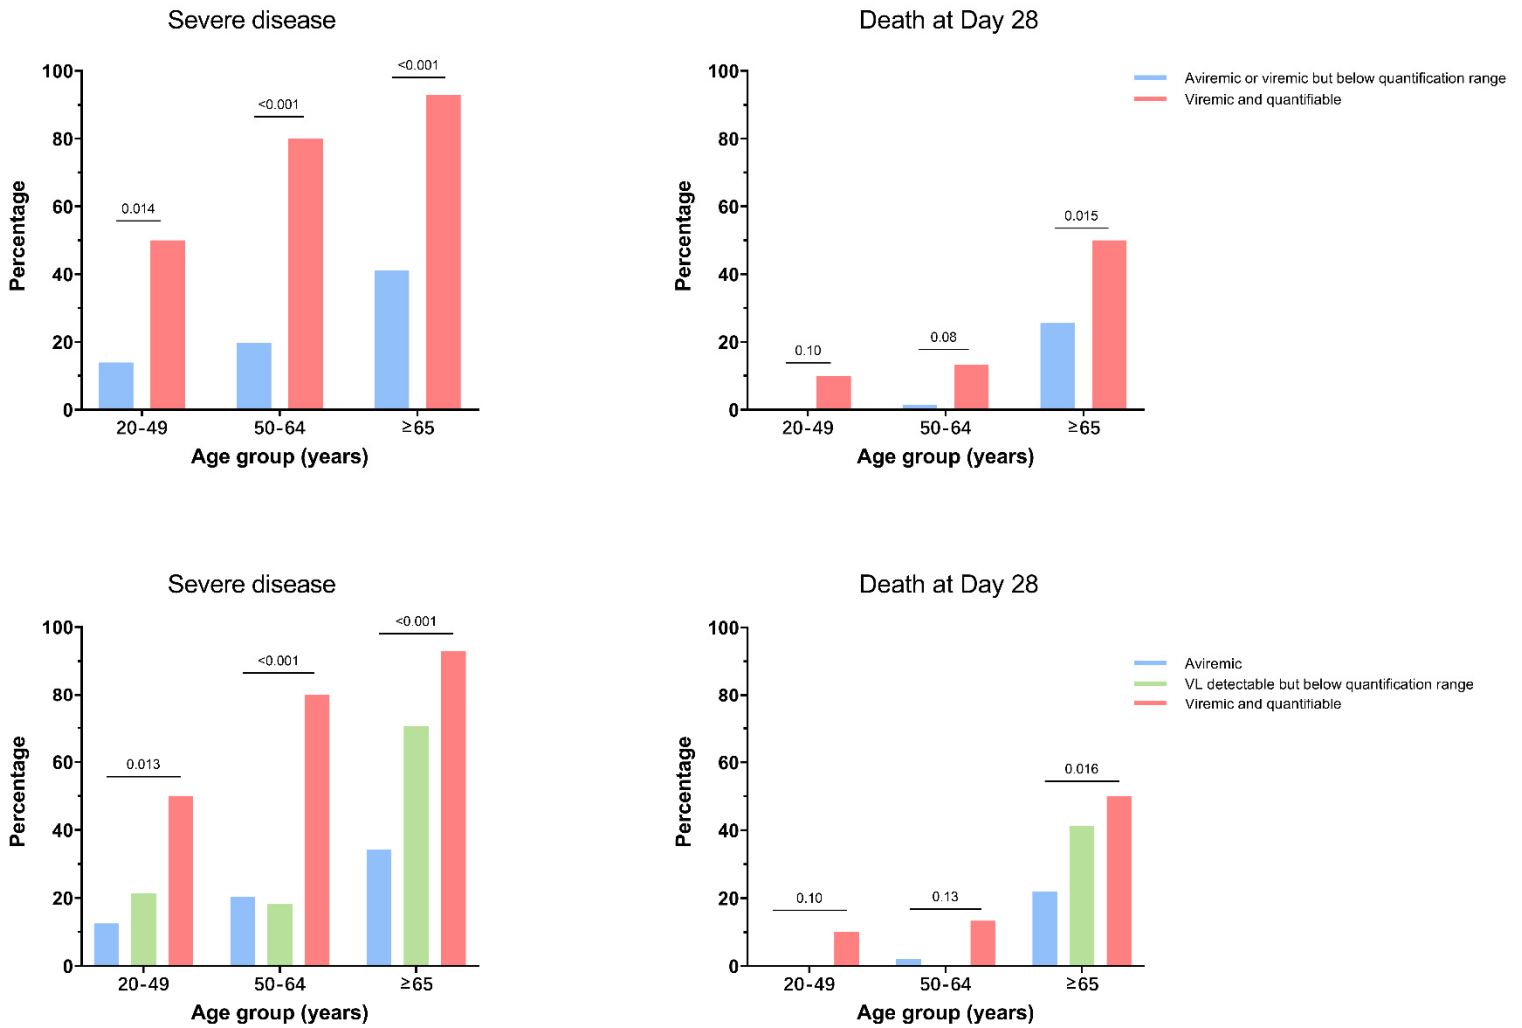

Supplementary Figure S4. 28-day mortality among different viremic groups.

Adjusted hazard ratio (aHR) was calculated using Cox Proportional regression adjusting for baseline characteristics including age, sex, race, BMI and laboratory values. Aviremic group served as reference.

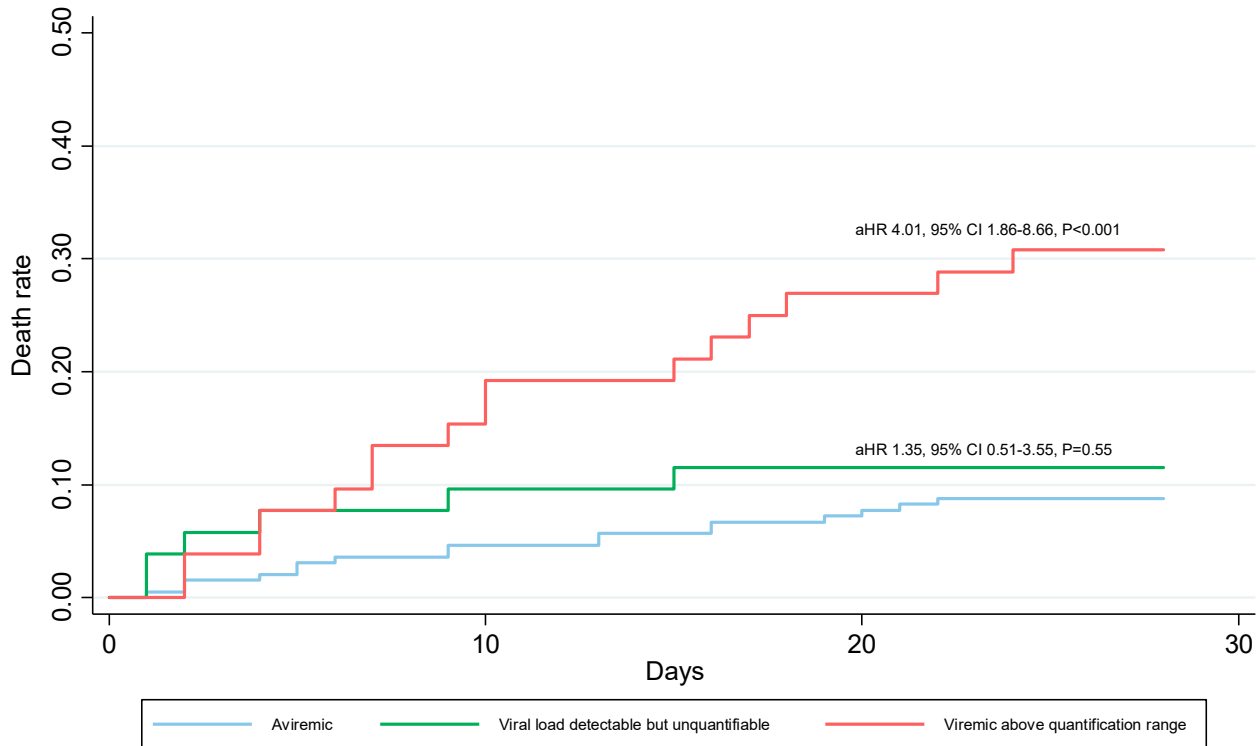



Supplementary Figure S6. Correlation between LDH, tissue-enriched protein levels, fibrosis markers, IL6, entry factors and viral load. Spearman correlation (rho) with P value <0.05 was demonstrated in this figure.

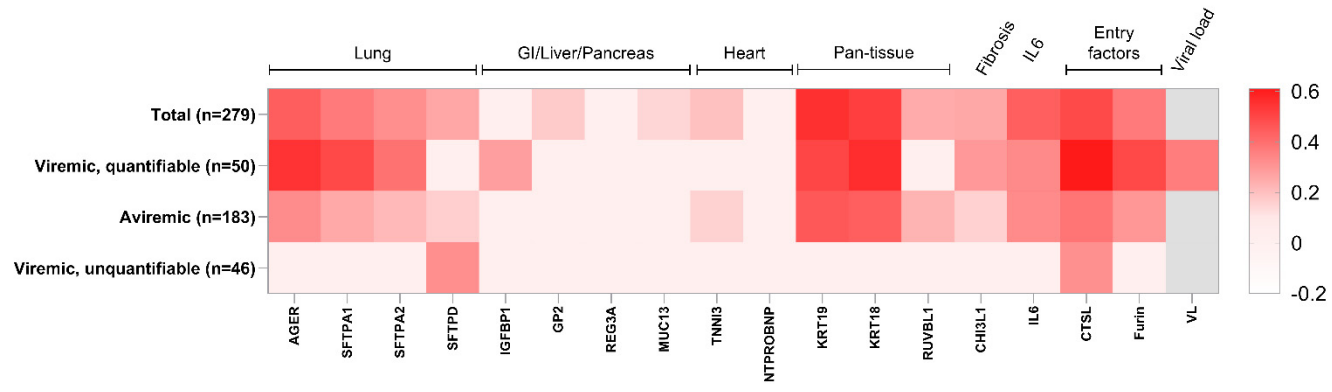

Supplementary Figure S7. Volcano plots showing NPX differences in protein levels between viremic and COVID-19 negative control participants at Day 0.

(A) Volcano plot generated by linear model without severity as a covariate. (B) Overlap of differentially expressed proteins derived from viremic vs. aviremic group comparisons and viremic vs. control group comparison, without severity as a covariate. (C) Volcano plot generated by linear model with severity as a covariate. (D) Overlap of differentially expressed proteins derived from viremic vs. aviremic group comparisons and viremic vs. control group comparison, with severity as a covariate.

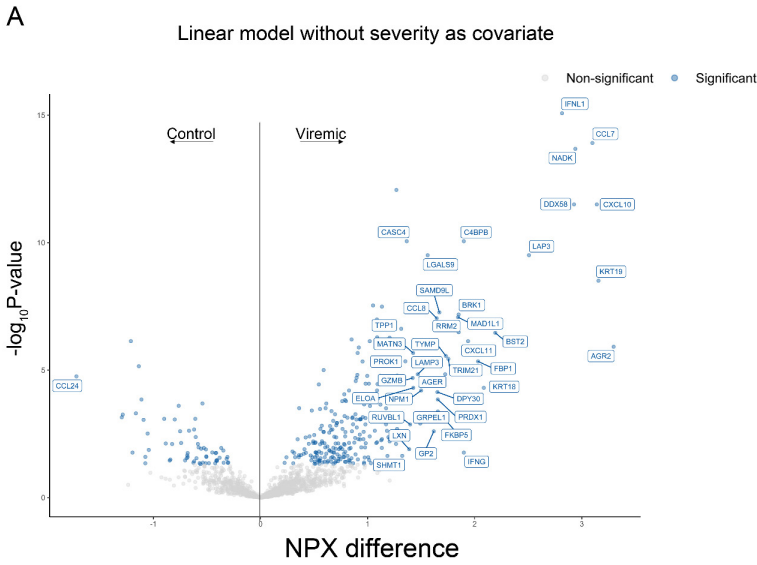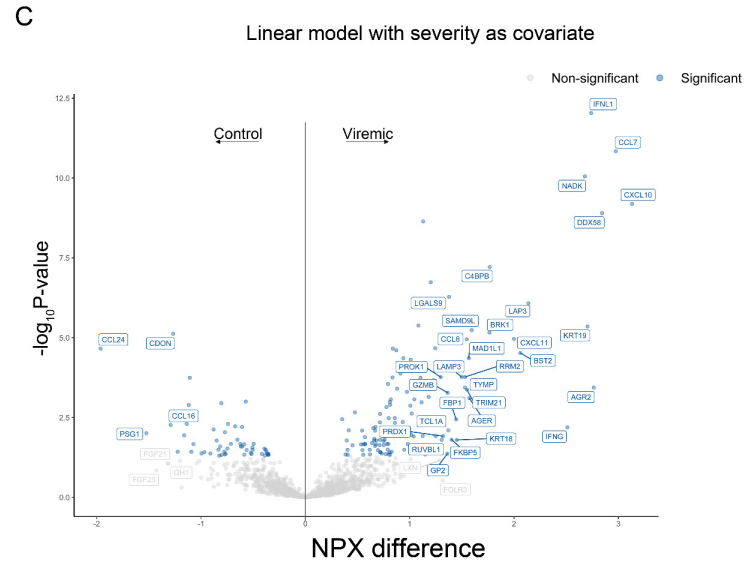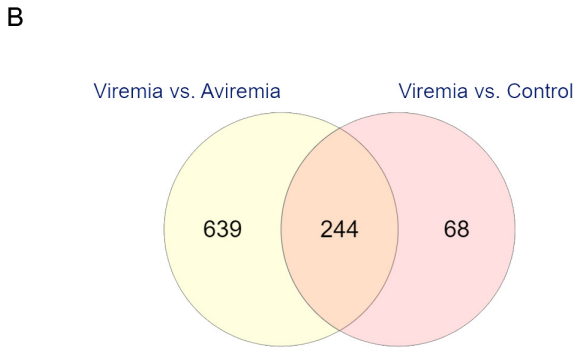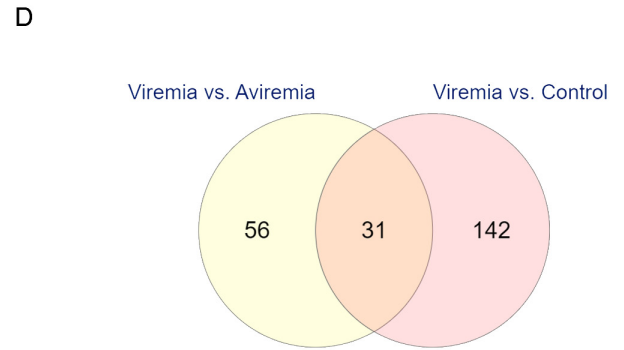

Supplementary Figure S8. Heatmap of the top 100 differentially expressed proteins between viremic and aviremic participants at Day 0.

Each row represents expression of an individual protein over the entire cohort; each cell represents the Z score of protein expression for all measurements across a row. Selected proteins are indicated.

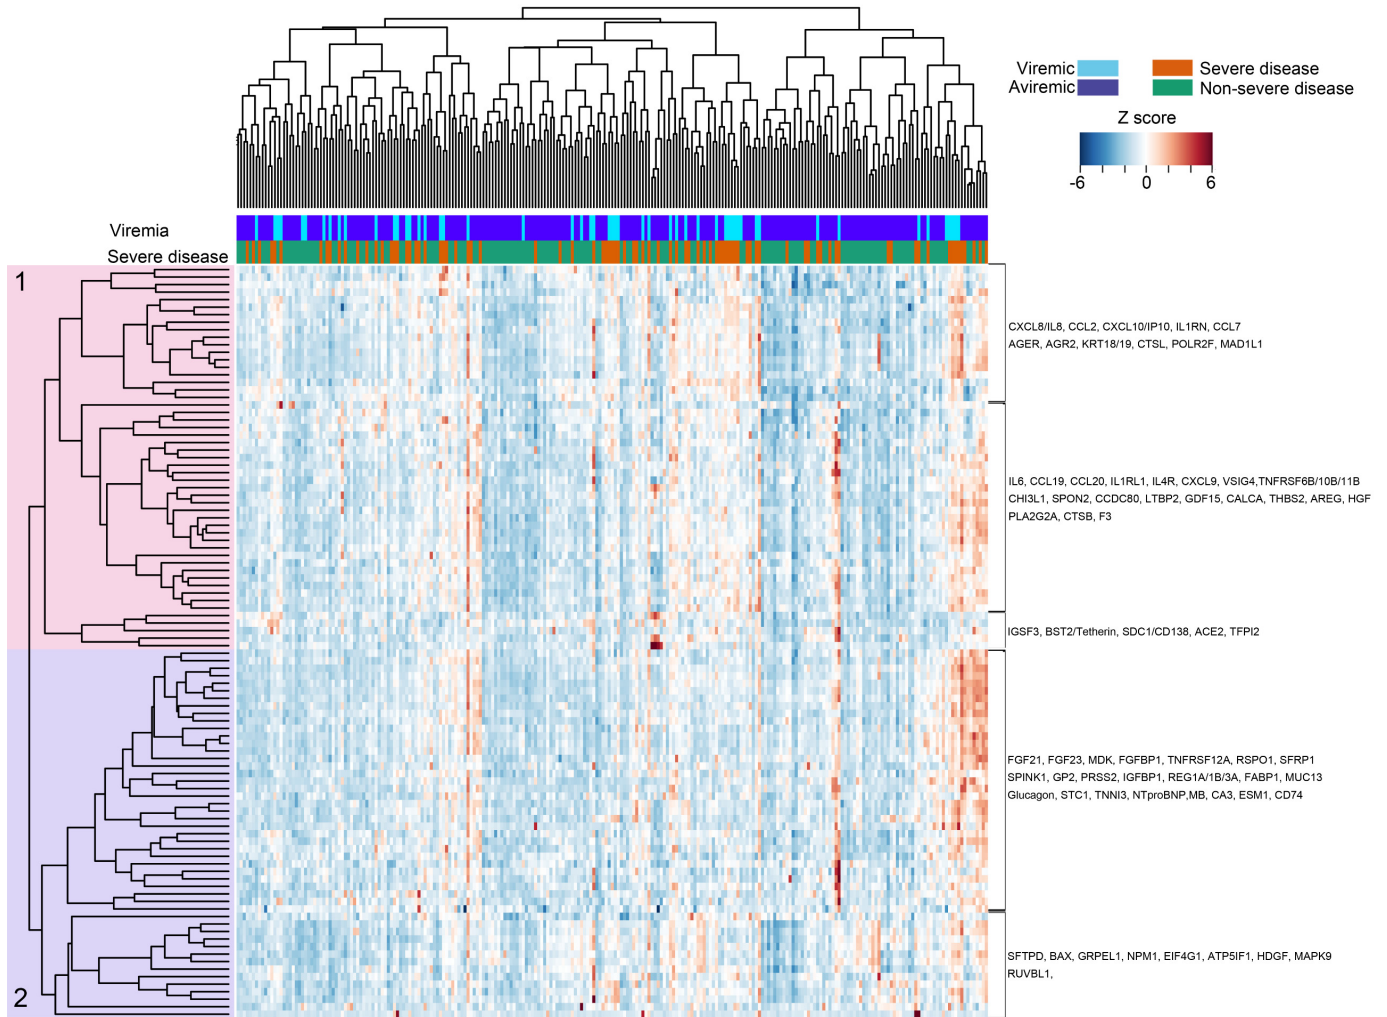



Supplementary Figure S9. Correlation between apoptosis-related protein, lung/GI tract related protein, pyroptosis-related protein and IL6.

Spearman correlation was performed in this analysis and only correlation value (rho) with a P<0.05 were shown in this graph in color (rho with P>0.05 was left in blank).

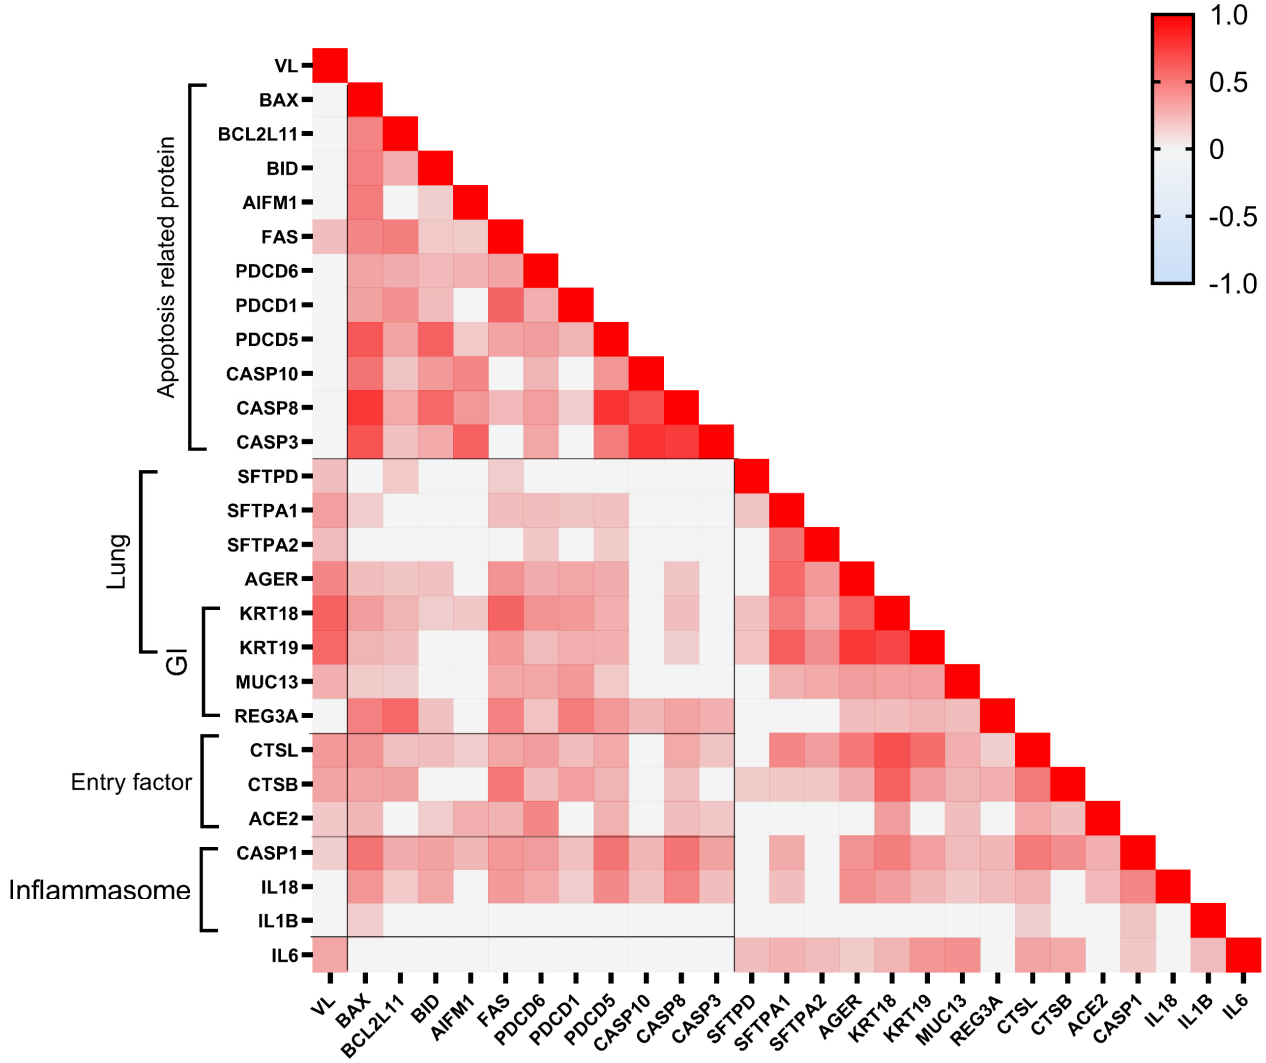

Supplementary Figure S10. Receiver operating characteristic (ROC) curve showing predictive performance of an elastic net logistic regression classifier of disease severity and viremia for Olink proteins.

Only participants with viremia above quantification range and undetectable were included in this analysis. Performance was evaluated using 100 repeats of 5-fold cross validation. (A) Predictors for severe disease. Mean area under the curve (AUC) with 95% confidence intervals (CI) was 0.83, 95%CI (0.80, 0.86). Top ten predictors are listed here. (B) Predictors for viremia. Mean AUC with 95% CI was 0.81, 95% CI (0.78, 0.83). Top ten predictors are listed here.

**A**

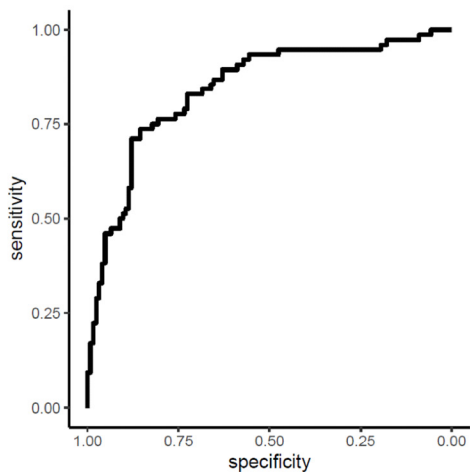

| Assay     | Mean Coefficient | UniProt |
|-----------|------------------|---------|
| Viremia   | 88.0             |         |
| SEMA4D    | 39.8             | Q92854  |
| ADGRG1    | 21.0             | Q9Y653  |
| NDRG1     | 19.6             | Q92597  |
| GBP2      | 10.4             | P32456  |
| DNER      | 10.1             | Q8NFT8  |
| TNFRSF11B | 8.1              | O00300  |
| KRT19     | 7.9              | P08727  |
| FASLG     | 7.8              | P48023  |
| IL6       | 7.7              | P05231  |

**B**

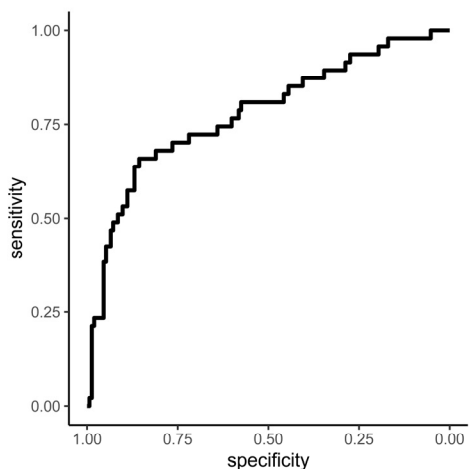

| Assay | Mean Coefficient | UniProt |
|-------|------------------|---------|
| PAMR1 | 80.0             | Q6UXH9  |
| AMN   | 53.9             | Q9BXJ7  |
| BAG3  | 41.5             | O95817  |
| AGER  | 35.4             | Q15109  |
| KRT19 | 28.6             | P08727  |
| NADK  | 17.3             | O95544  |
| IL6   | 13.0             | P05231  |
| ANG   | 11.8             | P03950  |
| PRDX1 | 11.0             | Q06830  |
| IL7R  | 10.4             | P16871  |

Supplementary Figure S11. Temporal trend of differentially expressed protein identified at Day 0. Protein levels (NPX) at Day 0, 3, and 7 were demonstrated. Differences between viremic and aviremic groups were evaluated using the linear mixed model. Error bars indicate standard error of mean. \*,  $P < 0.05$ ; \*\*,  $P < 0.01$ ; \*\*\*,  $P < 0.001$ .

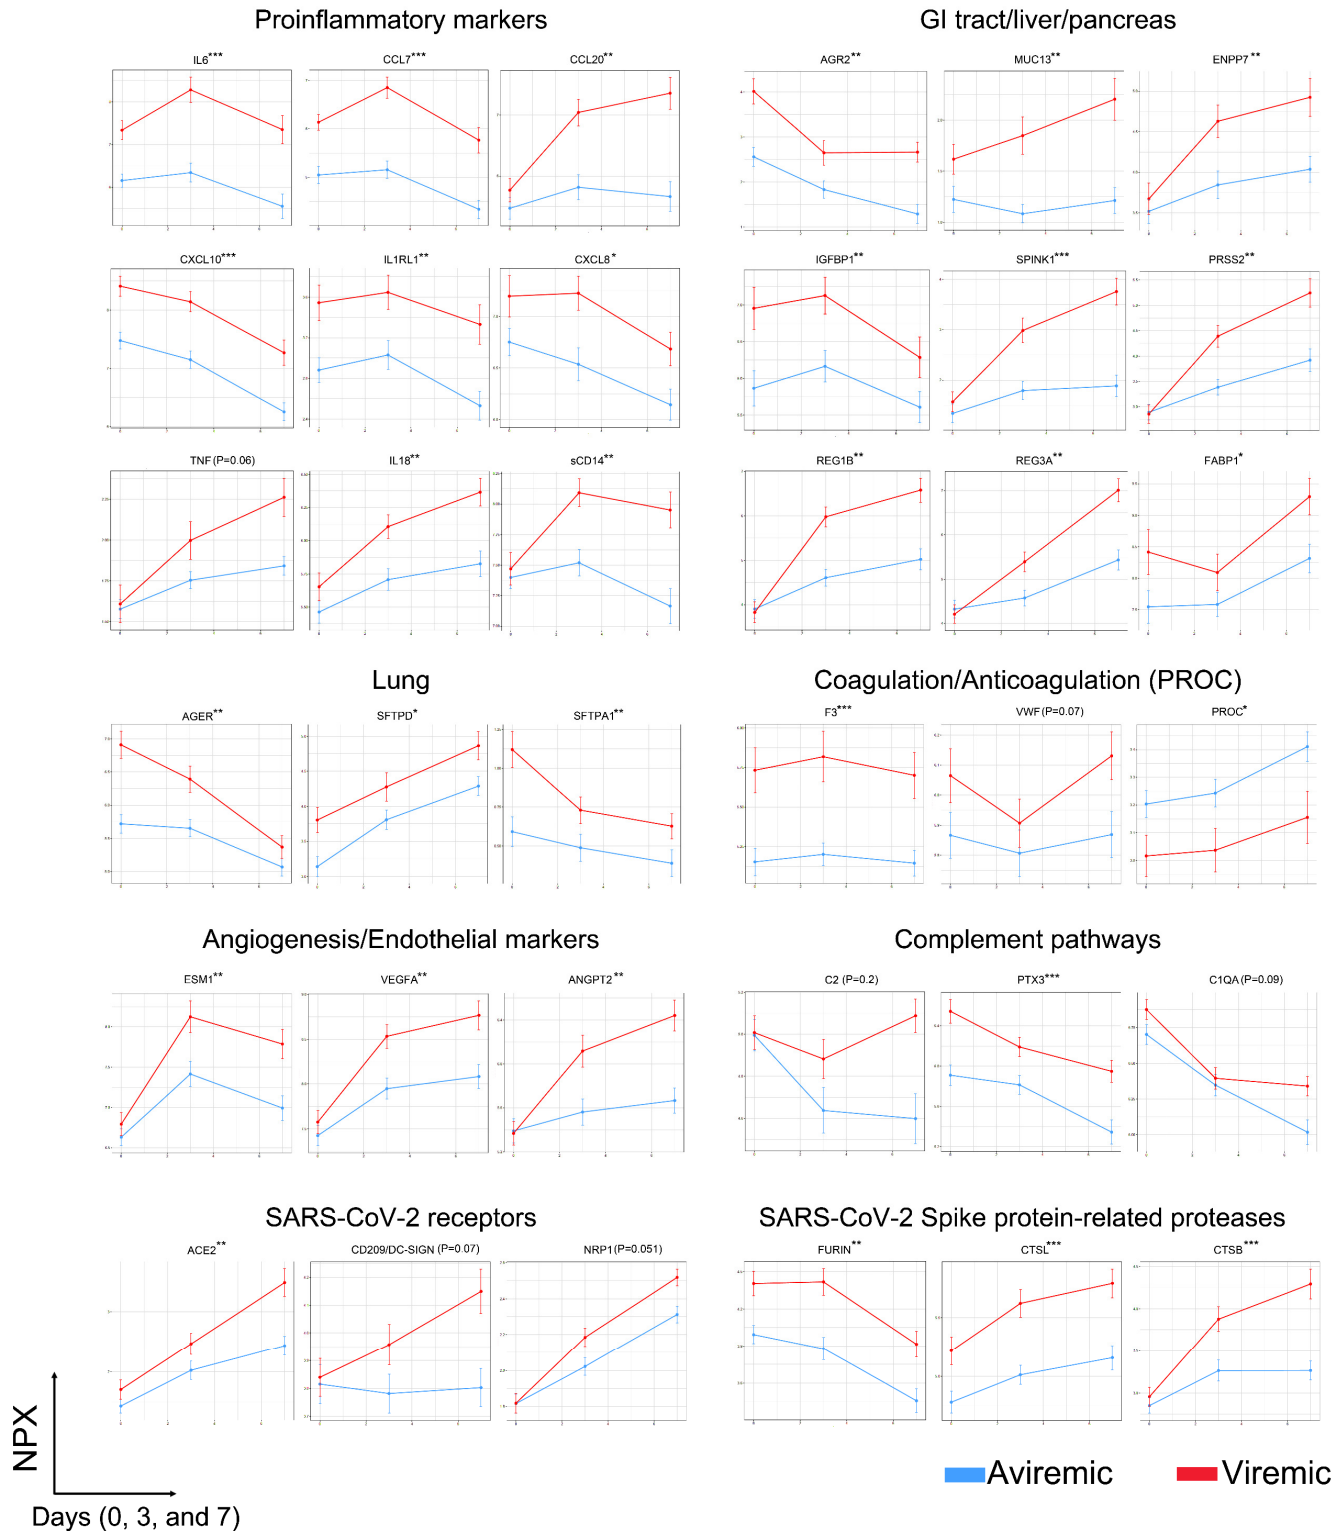

Supplementary Figure S12. Mean Z scores of interferon-stimulated genes (ISGs) based on SomaScan results.

ns, not significant.

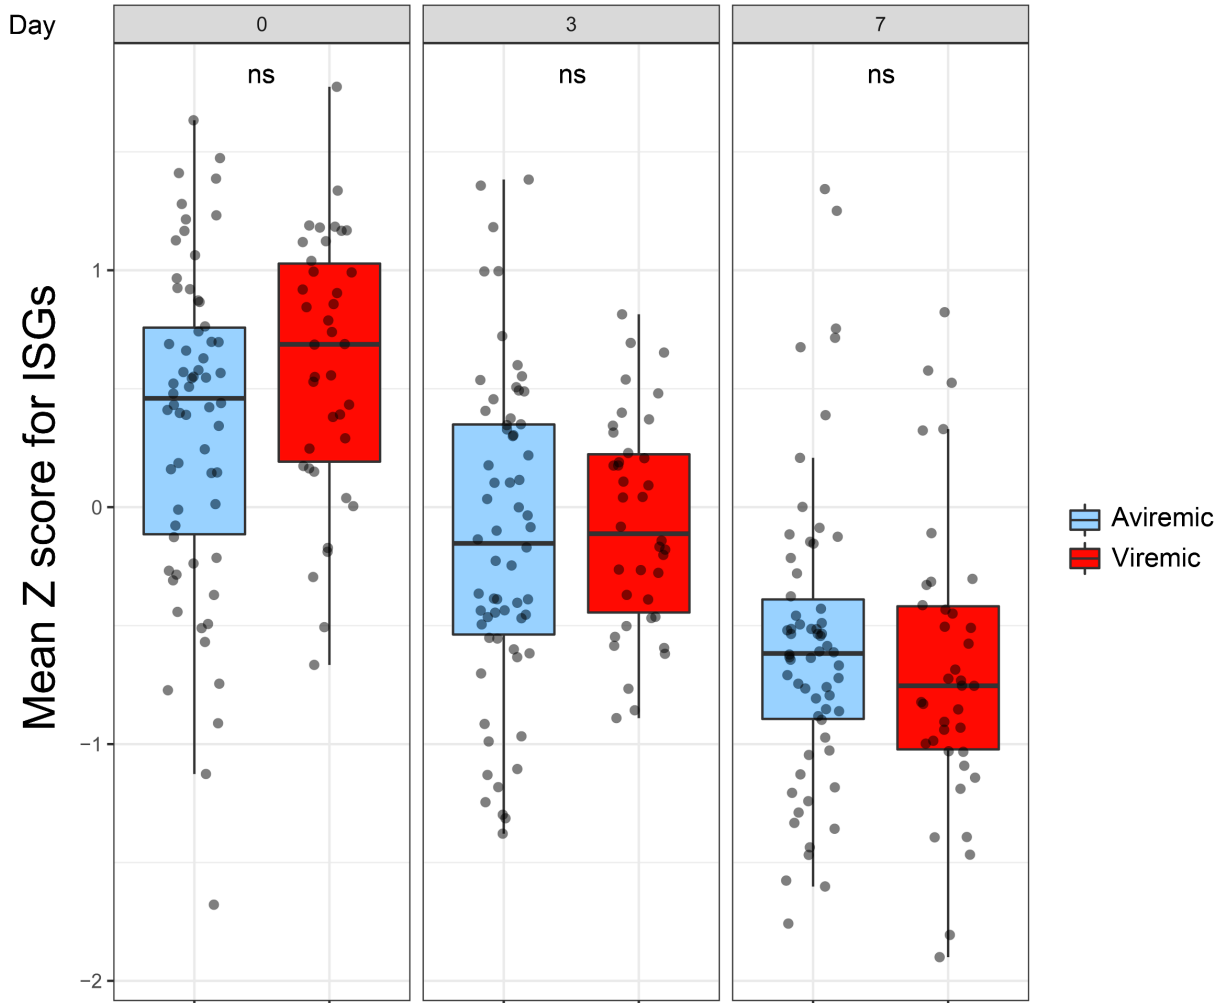

Supplementary Figure S13. Neutralization level at Day 3 and Day 7.

A subgroup of participants with undetectable viral load or detectable viral load (quantifiable or unquantifiable) at Day 3 (n=49) or Day 7 (n=39) were included in this analysis. Mann-Whitney test was used to compare the difference between two different groups. ns, not significant.

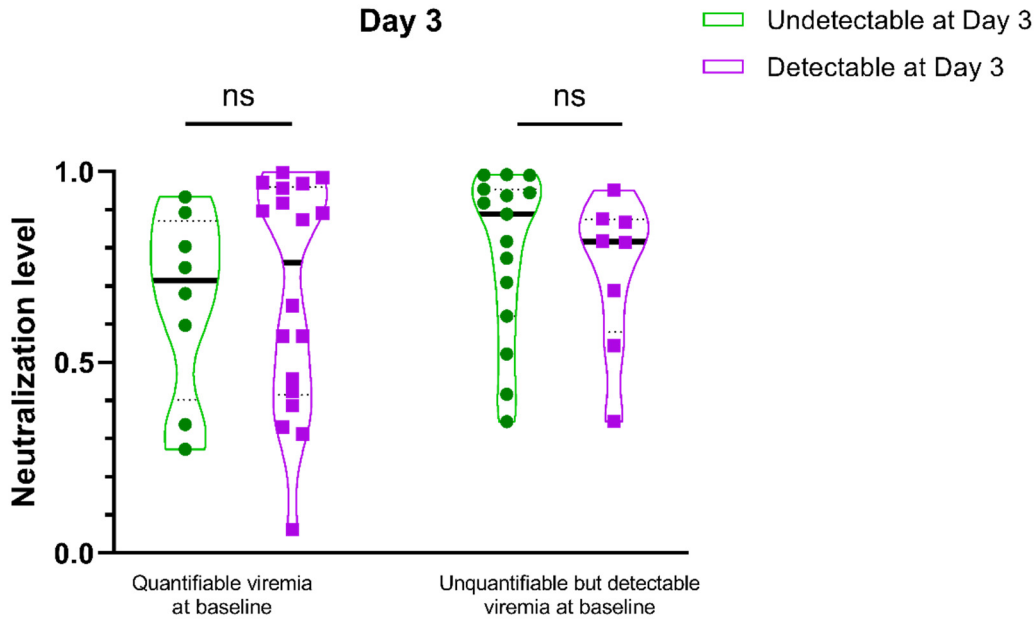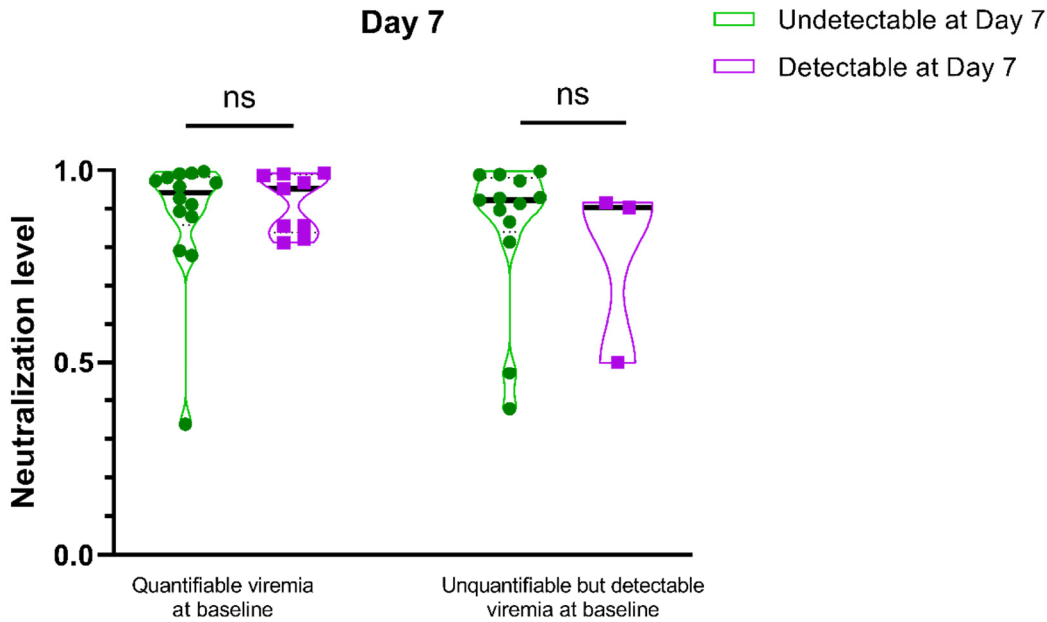

Supplementary Figure S14. Correlation of IL6, CXCL8/IL8, and TNF levels from four different Olink panels. (A-C) IL6, CXCL8/IL8 and TNF levels were repeated in four different Olink panels. Day 0 levels were displayed here and showed great correlation among Cardiometabolic, Inflammatory, Neurology and Oncology Olink panels. (D) Correlation between Olink proteomic panel and SomaScan proteomic panel.

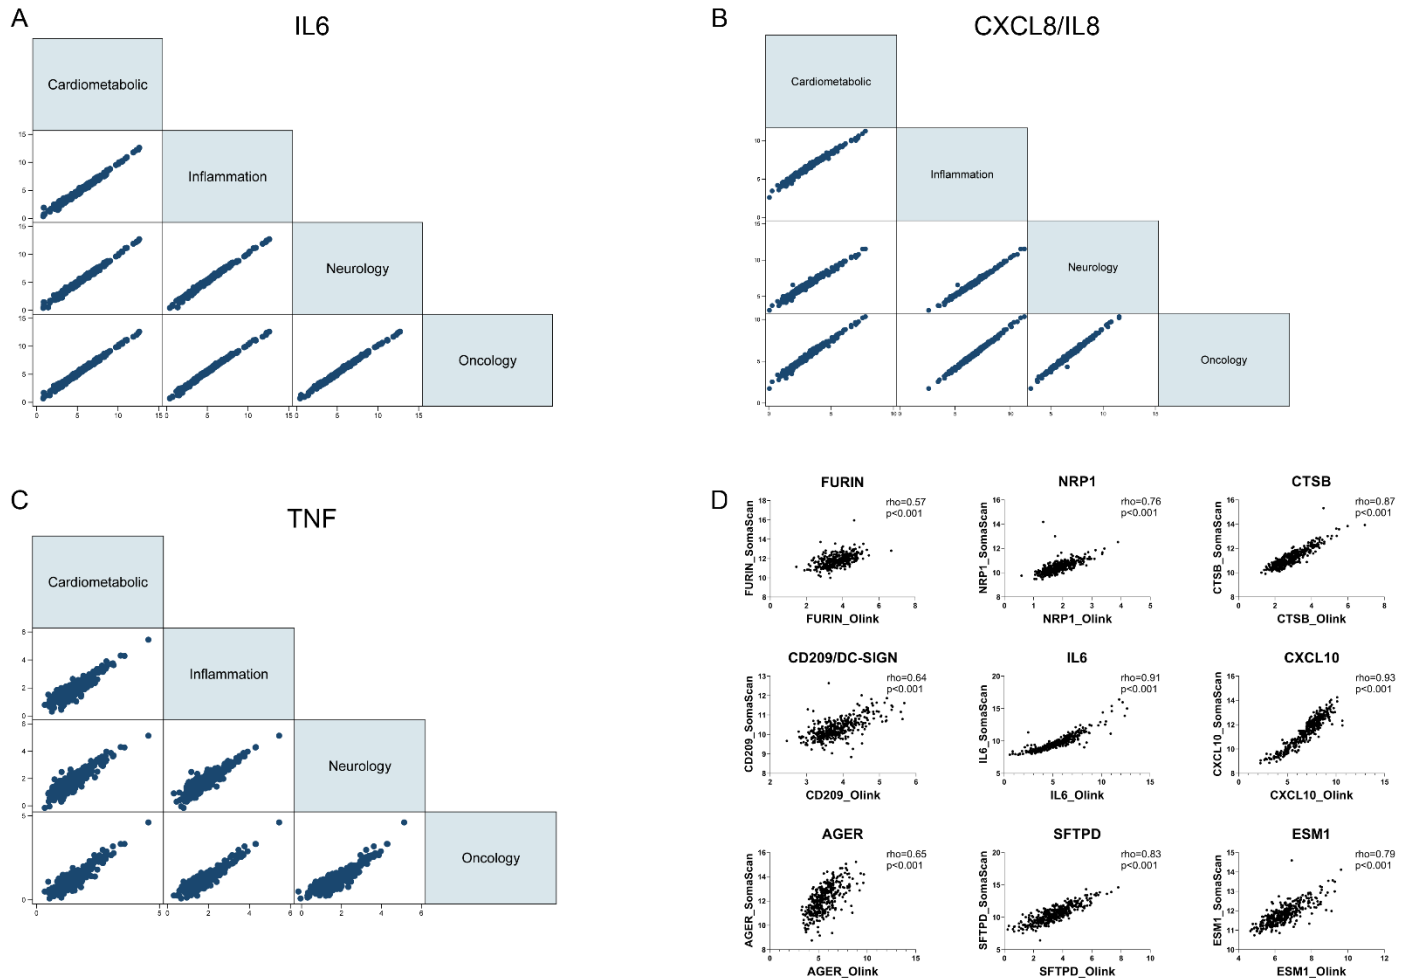

## References

1. Filbin, M.R., *et al.* Plasma proteomics reveals tissue-specific cell death and mediators of cell-cell interactions in severe COVID-19 patients. *bioRxiv : the preprint server for biology* **[Preprint]**(2020).
2. Monaco, G., *et al.* RNA-Seq Signatures Normalized by mRNA Abundance Allow Absolute Deconvolution of Human Immune Cell Types. *Cell reports* **26**, 1627-1640.e1627 (2019).
